# Supplementary material
Source: publisher site journal article supplement (https://www.dovepress.com/article/432407)
Supplement: Supplementary file 1 [file get_supplementary_file.php]

**Hypoxia and** **Singlet Oxygen Dual-Responsive Micelles for Photodynamic and Chemotherapy Therapy** **Featured with Enhanced Cellular Uptake and Triggered Cargo Delivery**

*Xuliang Guo, Lefei Han, Wenyu Chen,* *Huixin He, Weijin Zhang, Chaoqi Huang and Xiu Wang*

**

**

**Scheme S1.** The synthetic route of dually hypoxia-responsive mPEG-Azo-P(Asp-NI) copolymer.

**

**

**Scheme S2.** The synthetic route of dually hypoxia-responsive mPEG-Azo-P(Asp-NI)-Ce6 copolymer.


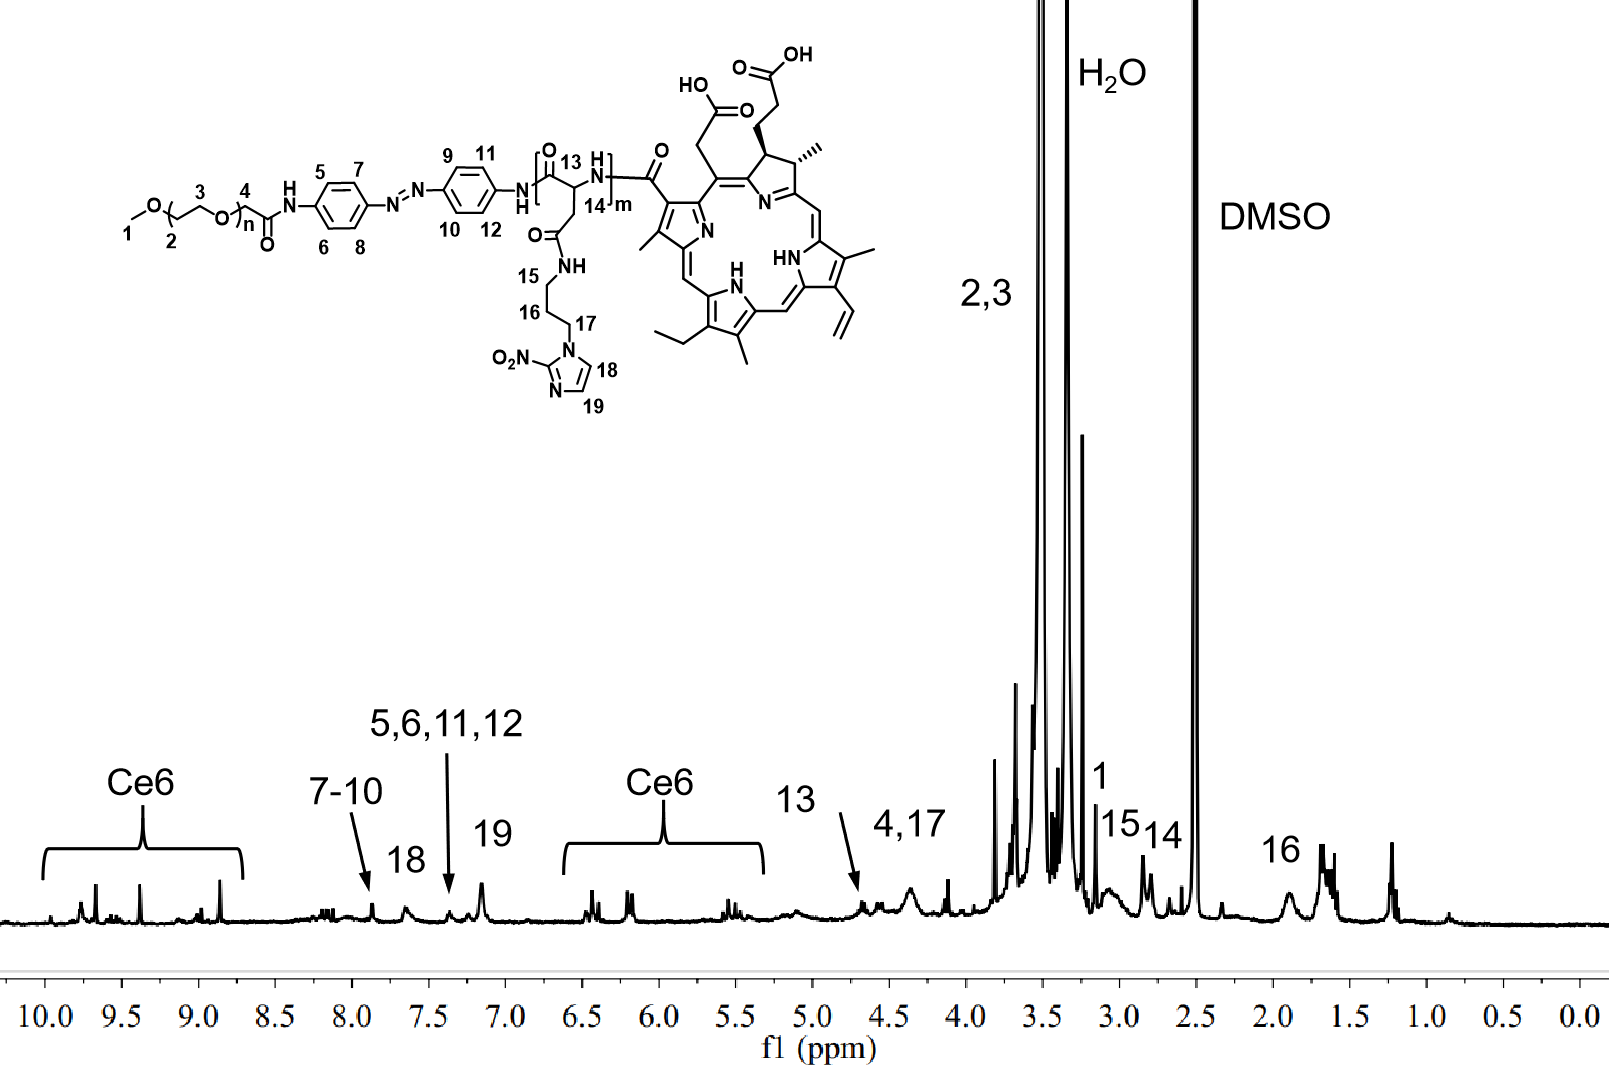


**Figure S1.** 1H NMR spectrum of mPEG-Azo-P(Asp-NI)-Ce6 (DMSO-*d*6).


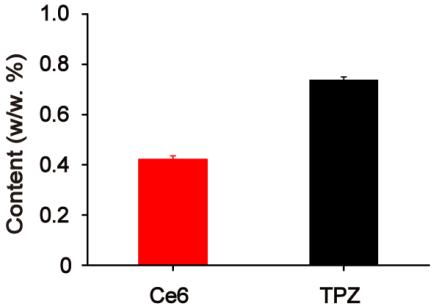


**Figure S2.** Ce6 and TPZ loading of the responsive micelles.


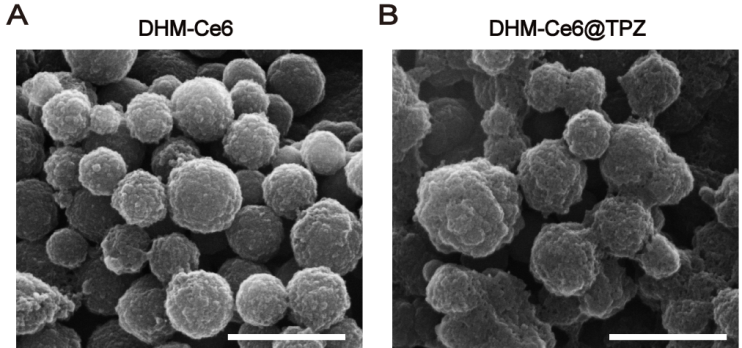


Figure S3.Scanning Electron Microscope (SEM) images of (A) DHM-Ce6 and (B) DHM-Ce6 @TPZ (scale bar: 500 nm).


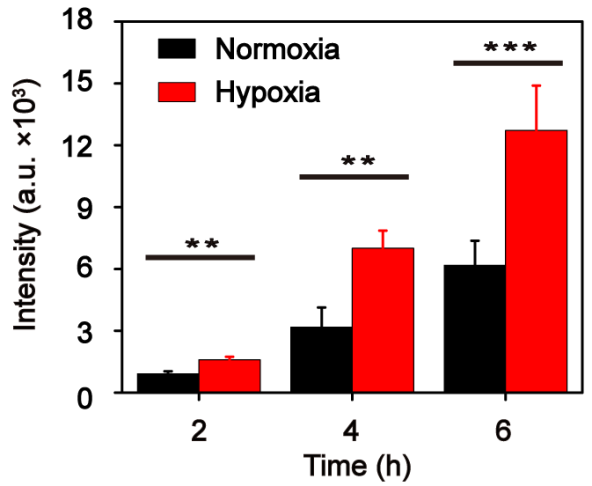


Figure S4. Summary of Ce6’s ﬂuorescence intensity in 4T1 cells treated by DHM-Ce6@TPZ under normoxia or hypoxia (**p < 0.01, ***p < 0.001, n = 3).


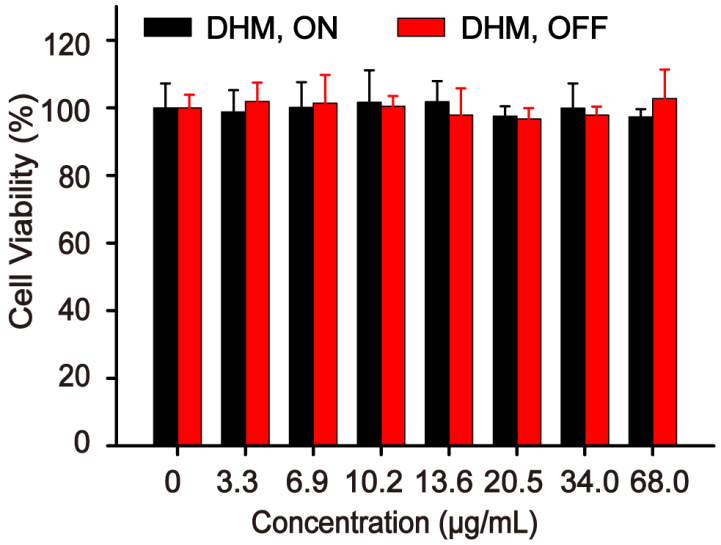


Figure S5. Viability of 4T1 cells in response to DHM with or without laser irradiation under normoxia (n = 4).


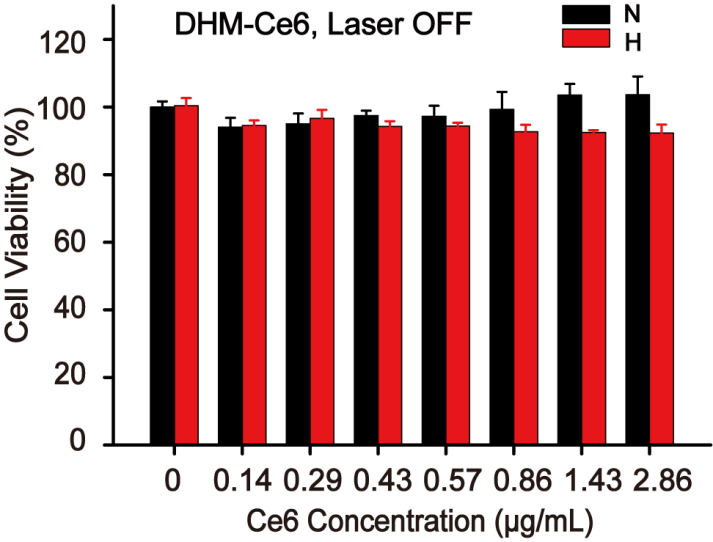


Figure S6. Viability of 4T1 cells in response to DHM-Ce6 without laser irradiation under normoxia or hypoxia (n = 4).


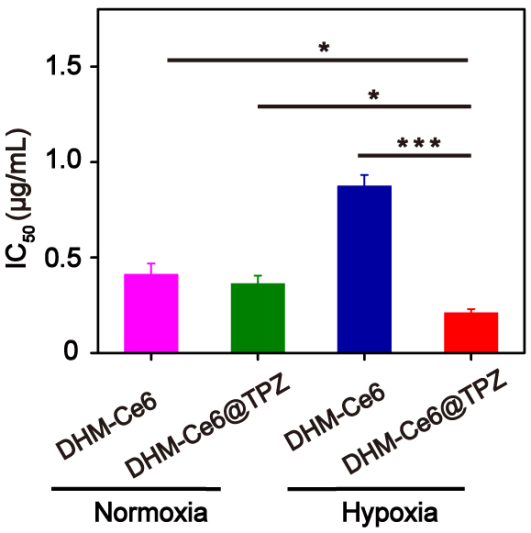


Figure S7. IC50 summary of two formulations under normoxia or hypoxia (*p < 0.05, ***p < 0.001, n = 3).


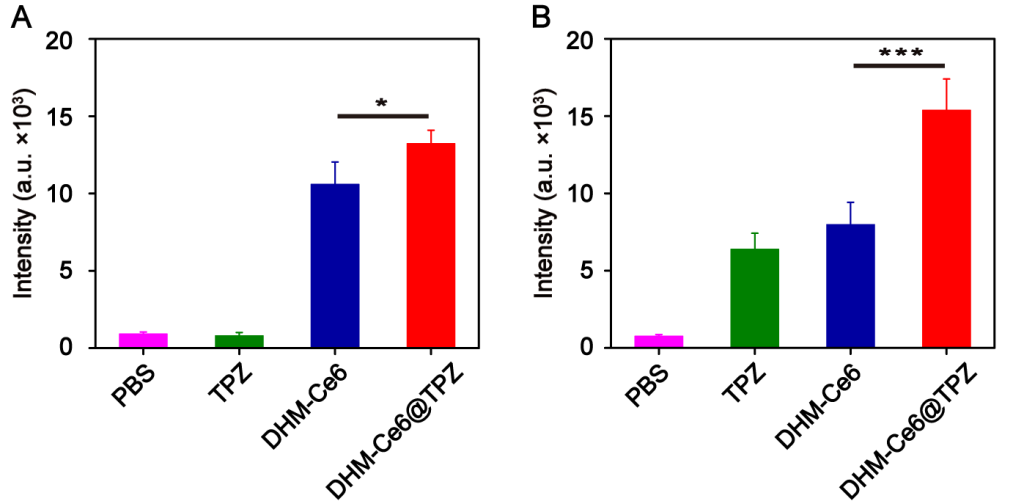


Figure S8. The fluorescence intensity of DCF probe in 4T1 cells treated by different formulations under normoxia (A) or hypoxia (B) (n = 3). *p < 0.05, ***p < 0.001.


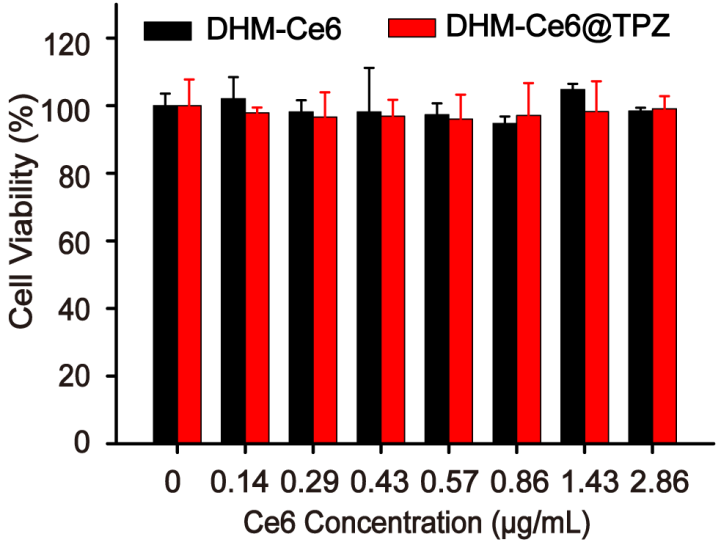


Figure S9. Viability of 3T3 cells in response to DHM-Ce6 and DHM-Ce6@TPZ micelles without laser irradiation under normoxia (n = 4).


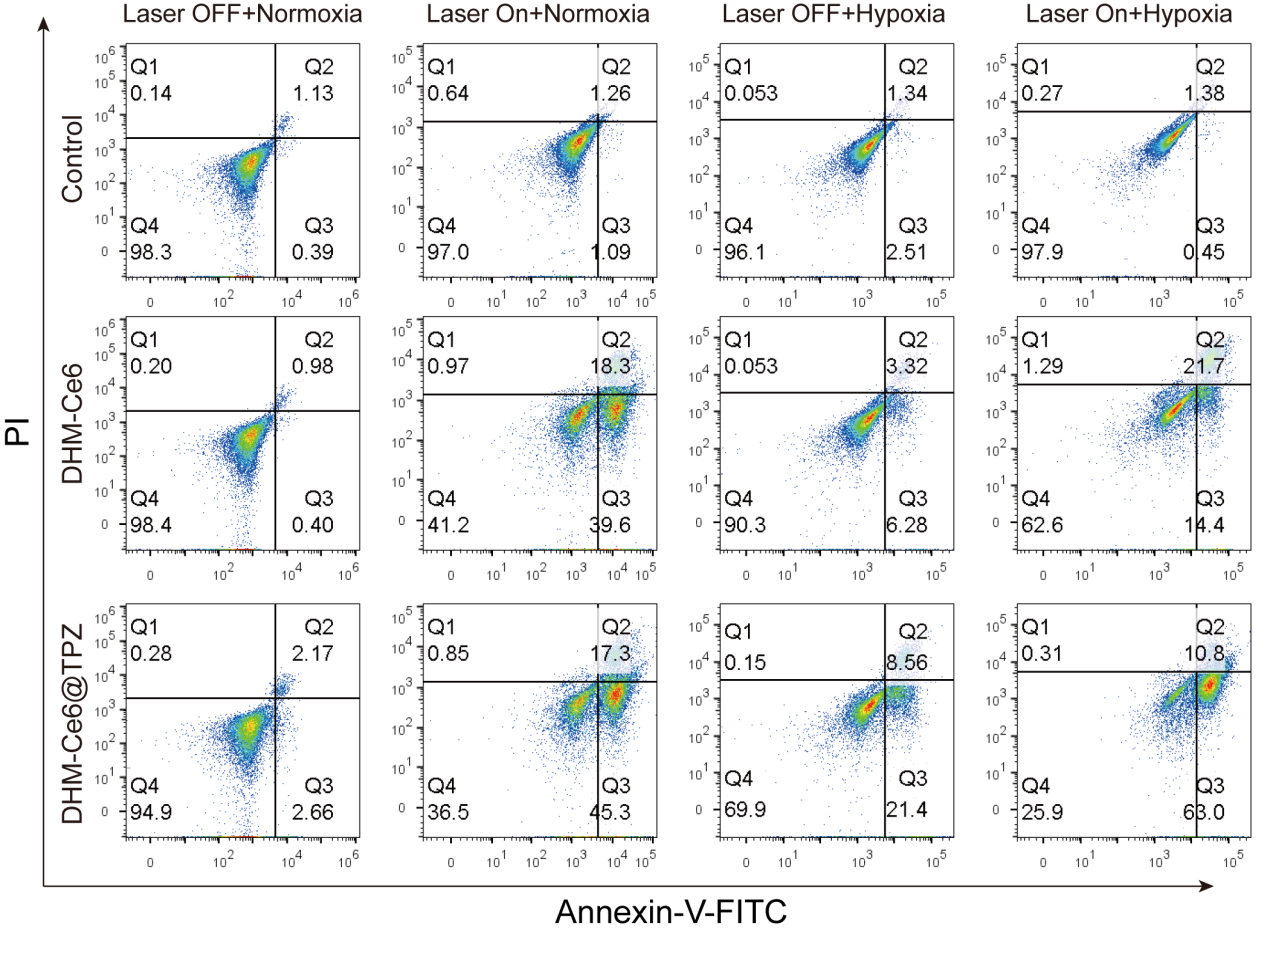


Figure S10. Flow cytometry analysis of the 4T1 cells under different conditions. The cells were treated by two formulations including DHM-Ce6 and DHM-Ce6@TPZ micelles (n = 4).


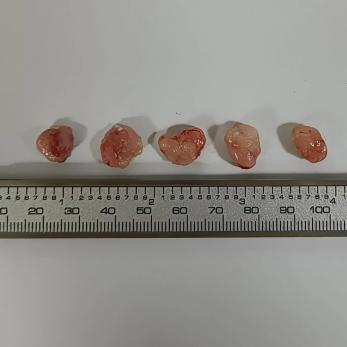


Figure S11. Tumor images at the end of treatment in the Ce6 (Laser ON) group.

**Table S1.** Summary of IC50 values of DHM-Ce6 and DHM-Ce6@TPZ against 4T1 cells.

| Index | DHM-Ce6 | DHM-Ce6@TPZ |
| --- | --- | --- |
| Normoxia+Laser on  IC50/Ce6(μg mL-1) | 0.412±0.056 | 0.363±0.042 |
| Hypoxia+Laser on  IC50/Ce6(μg mL-1) | 0.875±0.058 | 0.211±0.019 |
